# Supplementary material for: Power flow analysis using quantum and digital annealers: a discrete combinatorial optimization approach
Source: PubMed Central journal article supplement — Sci Rep. 2024 Oct 5;14:23216. doi: 10.1038/s41598-024-73512-7 (PMC11455892; doi:10.1038/s41598-024-73512-7), 2024-10-05
Supplement: 41598_2024_73512_MOESM1_ESM.pdf [file 41598_2024_73512_MOESM1_ESM.pdf]

# Supplementary information

## Power flow analysis using quantum and digital annealers: A discrete combinatorial optimization approach

Zeynab Kaseb<sup>1,\*</sup>, Matthias Möller<sup>2</sup>, Pedro P. Vergara<sup>1</sup>, Peter Palensky<sup>1</sup>

<sup>1</sup>Electrical Sustainable Energy, Delft University of Technology,  
P.O. Box 5031, 2600 GA Delft, The Netherlands

<sup>2</sup>Applied Mathematics, Delft University of Technology, P.O. Box 5031,  
2600 GA Delft, The Netherlands

Z.Kaseb@tudelft.nl

## Supplementary tables

For justifying the partitioned AQPF algorithm applied on the 14-bus test system, the obtained  $\vec{\mu}$  and  $\vec{\omega}$  with  $\epsilon = 1 \times 10^{-3}$  using DA are presented in the following table. The corresponding  $\vec{\mu}$  and  $\vec{\omega}$  obtained by NR are also included in the table.

Table 1: Comparison of  $\vec{\mu}$  and  $\vec{\omega}$  obtained by DA using a partitioned AQPF and NR for the 14-bus test system.

| $i$ | DA      |            | NR      |            |
|-----|---------|------------|---------|------------|
|     | $\mu_i$ | $\omega_i$ | $\mu_i$ | $\omega_i$ |
| 0   | 1.0     | 0.0        | 1.0     | 0.0        |
| 1   | 1.045   | -0.106     | 1.038   | -0.118     |
| 2   | 0.986   | -0.239     | 0.978   | -0.249     |
| 3   | 1.001   | -0.197     | 0.996   | -0.203     |
| 4   | 1.007   | -0.154     | 0.999   | -0.176     |
| 5   | 1.051   | -0.280     | 1.029   | -0.292     |
| 6   | 1.030   | -0.284     | 1.012   | -0.265     |
| 7   | 1.075   | -0.257     | 1.054   | -0.276     |
| 8   | 1.010   | -0.290     | 0.989   | -0.288     |
| 9   | 1.001   | -0.289     | 0.987   | -0.291     |
| 10  | 1.028   | -0.296     | 1.014   | -0.293     |
| 11  | 1.063   | -0.312     | 1.028   | -0.302     |
| 12  | 1.002   | -0.297     | 1.002   | -0.301     |
| 13  | 0.979   | -0.302     | 0.972   | -0.306     |

To justify the expected reduction of problem encoding correctness from the discretization of the PF problem, we compare the results obtained using the Newton-Raphson (NR) method and the Adiabatic Quantum Power Flow (AQPF) algorithm with the QUBO formulation and the Digital Annealer (DA) solver over iterations. The following remarks should be noted:

- Although the number of iterations required by NR is less compared to DA, the clock time consumed per iteration on DA is significantly less by orders of magnitude.
- The accuracy of the results obtained in the final iteration by the DA can be further refined if a smaller threshold is set. This implies that the AQPF algorithm can achieve even higher precision if required.
- One significant advantage of the AQPF algorithm is its ability to mitigate the divergence problem commonly faced by classical solvers. The

Table 2: Performance comparison of Fujitsu’s digital annealer V3 (DA) with the Newton-Raphson classical solver (NR) over iterations (it). The AQPF algorithm is implemented using the QUBO formulation for the 4-bus test system. The reference bus  $i = 0$  with known values of  $\mu_0 = 1$  and  $\omega_0 = 0$  is not shown.

|    | it | $\mu_1$ | $\mu_2$ | $\mu_3$ | $\omega_1$ | $\omega_2$ | $\omega_3$ |
|----|----|---------|---------|---------|------------|------------|------------|
| NR | 1  | 0.95    | 0.96    | 0.94    | -0.03      | -0.025     | -0.04      |
|    | 2  | 0.925   | 0.935   | 0.915   | -0.06      | -0.055     | -0.07      |
|    | 3  | 0.91    | 0.921   | 0.901   | -0.092     | -0.080     | -0.104     |
|    | 4  | 0.902   | 0.916   | 0.890   | -0.092     | -0.080     | -0.104     |
| DA | 1  | 0.96    | 0.96    | 0.96    | -0.04      | -0.04      | -0.04      |
|    | 2  | 0.94    | 0.94    | 0.94    | -0.06      | -0.06      | -0.06      |
|    | 3  | 0.94    | 0.94    | 0.92    | -0.06      | -0.06      | -0.08      |
|    | 4  | 0.92    | 0.94    | 0.9     | -0.08      | -0.08      | -0.1       |
|    | 5  | 0.91    | 0.93    | 0.9     | -0.09      | -0.08      | -0.1       |
|    | 6  | 0.91    | 0.93    | 0.9     | -0.09      | -0.08      | -0.1       |
|    | 7  | 0.91    | 0.93    | 0.9     | -0.09      | -0.08      | -0.1       |
|    | 8  | 0.91    | 0.93    | 0.9     | -0.09      | -0.08      | -0.1       |
|    | 9  | 0.909   | 0.929   | 0.901   | -0.09      | -0.079     | -0.101     |
|    | 10 | 0.91    | 0.928   | 0.901   | -0.091     | -0.078     | -0.102     |
|    | 11 | 0.909   | 0.927   | 0.901   | -0.091     | -0.079     | -0.103     |
|    | 12 | 0.91    | 0.926   | 0.902   | -0.091     | -0.079     | -0.103     |
|    | 13 | 0.91    | 0.921   | 0.897   | -0.091     | -0.079     | -0.103     |
|    | 14 | 0.91    | 0.921   | 0.897   | -0.091     | -0.079     | -0.103     |
|    | 15 | 0.91    | 0.921   | 0.897   | -0.091     | -0.079     | -0.103     |
|    | 16 | 0.91    | 0.921   | 0.897   | -0.091     | -0.079     | -0.103     |
|    | 17 | 0.91    | 0.921   | 0.897   | -0.091     | -0.079     | -0.103     |
|    | 18 | 0.91    | 0.921   | 0.897   | -0.091     | -0.079     | -0.103     |
|    | 19 | 0.91    | 0.921   | 0.897   | -0.091     | -0.079     | -0.103     |
|    | 20 | 0.91    | 0.921   | 0.897   | -0.091     | -0.079     | -0.103     |
|    | 21 | 0.909   | 0.92    | 0.898   | -0.091     | -0.079     | -0.103     |
|    | 22 | 0.908   | 0.919   | 0.897   | -0.091     | -0.079     | -0.103     |
|    | 23 | 0.904   | 0.918   | 0.896   | -0.092     | -0.079     | -0.103     |
|    | 24 | 0.904   | 0.917   | 0.892   | -0.092     | -0.079     | -0.104     |

AQPF algorithm demonstrates robustness in scenarios where the power consumption information is incomplete.

## Supplementary equations

For the QUBO formulation of the net active power, substitution of equations (7)–(8) into equation (5) yields

$$\begin{aligned}
p_i = & \sum_{j=0}^n \mu_i^0 g_{ij} \mu_j^0 + \mu_i^0 g_{ij} x_{j,0}^\mu \Delta \mu_j - \mu_i^0 g_{ij} x_{j,1}^\mu \Delta \mu_j \\
& + x_{i,0}^\mu \Delta \mu_i g_{ij} \mu_j^0 + x_{i,0}^\mu \Delta \mu_i g_{ij} x_{j,0}^\mu \Delta \mu_j - x_{i,0}^\mu \Delta \mu_i g_{ij} x_{j,1}^\mu \Delta \mu_j \\
& - x_{i,1}^\mu \Delta \mu_i g_{ij} \mu_j^0 - x_{i,1}^\mu \Delta \mu_i g_{ij} x_{j,0}^\mu \Delta \mu_j + x_{i,1}^\mu \Delta \mu_i g_{ij} x_{j,1}^\mu \Delta \mu_j \\
& + \omega_i^0 g_{ij} \omega_j^0 + \omega_i^0 g_{ij} x_{j,0}^\omega \Delta \omega_j - \omega_i^0 g_{ij} x_{j,1}^\omega \Delta \omega_j \\
& + x_{i,0}^\omega \Delta \omega_i g_{ij} \omega_j^0 + x_{i,0}^\omega \Delta \omega_i g_{ij} x_{j,0}^\omega \Delta \omega_j - x_{i,0}^\omega \Delta \omega_i g_{ij} x_{j,1}^\omega \Delta \omega_j \\
& - x_{i,1}^\omega \Delta \omega_i g_{ij} \omega_j^0 - x_{i,1}^\omega \Delta \omega_i g_{ij} x_{j,0}^\omega \Delta \omega_j + x_{i,1}^\omega \Delta \omega_i g_{ij} x_{j,1}^\omega \Delta \omega_j \\
& + \omega_i^0 b_{ij} \mu_j^0 + \omega_i^0 b_{ij} x_{j,0}^\mu \Delta \mu_j - \omega_i^0 b_{ij} x_{j,1}^\mu \Delta \mu_j \\
& + x_{i,0}^\omega \Delta \omega_i b_{ij} \mu_j^0 + x_{i,0}^\omega \Delta \omega_i b_{ij} x_{j,0}^\mu \Delta \mu_j - x_{i,0}^\omega \Delta \omega_i b_{ij} x_{j,1}^\mu \Delta \mu_j \\
& - x_{i,1}^\omega \Delta \omega_i b_{ij} \mu_j^0 - x_{i,1}^\omega \Delta \omega_i b_{ij} x_{j,0}^\mu \Delta \mu_j + x_{i,1}^\omega \Delta \omega_i b_{ij} x_{j,1}^\mu \Delta \mu_j \\
& - \mu_i^0 b_{ij} \omega_j^0 - \mu_i^0 b_{ij} x_{j,0}^\omega \Delta \omega_j + \mu_i^0 b_{ij} x_{j,1}^\omega \Delta \omega_j \\
& - x_{i,0}^\mu \Delta \mu_i b_{ij} \omega_j^0 - x_{i,0}^\mu \Delta \mu_i b_{ij} x_{j,0}^\omega \Delta \omega_j + x_{i,0}^\mu \Delta \mu_i b_{ij} x_{j,1}^\omega \Delta \omega_j \\
& + x_{i,1}^\mu \Delta \mu_i b_{ij} \omega_j^0 + x_{i,1}^\mu \Delta \mu_i b_{ij} x_{j,0}^\omega \Delta \omega_j - x_{i,1}^\mu \Delta \mu_i b_{ij} x_{j,1}^\omega \Delta \omega_j.
\end{aligned} \tag{1}$$

A similar expression can also be derived for the QUBO formulation of the net reactive power injection by substituting (7)–(8) into equation (6).

$$\begin{aligned}
q_i = & \sum_{j=0}^n \omega_i^0 g_{ij} \mu_j^0 + \omega_i^0 g_{ij} x_{j,0}^\mu \Delta \mu_j - \omega_i^0 g_{ij} x_{j,1}^\mu \Delta \mu_j \\
& + x_{i,0}^\omega \Delta \omega_i g_{ij} \mu_j^0 + x_{i,0}^\omega \Delta \omega_i g_{ij} x_{j,0}^\mu \Delta \mu_j - x_{i,0}^\omega \Delta \omega_i g_{ij} x_{j,1}^\mu \Delta \mu_j \\
& - x_{i,1}^\omega \Delta \omega_i g_{ij} \mu_j^0 - x_{i,1}^\omega \Delta \omega_i g_{ij} x_{j,0}^\mu \Delta \mu_j + x_{i,1}^\omega \Delta \omega_i g_{ij} x_{j,1}^\mu \Delta \mu_j \\
& \quad - \mu_i^0 g_{ij} \omega_j^0 - \mu_i^0 g_{ij} x_{j,0}^\omega \Delta \omega_j + \mu_i^0 g_{ij} x_{j,1}^\omega \Delta \omega_j \\
& - x_{i,0}^\mu \Delta \mu_i g_{ij} \omega_j^0 - x_{i,0}^\mu \Delta \mu_i g_{ij} x_{j,0}^\omega \Delta \omega_j + x_{i,0}^\mu \Delta \mu_i g_{ij} x_{j,1}^\omega \Delta \omega_j \\
& + x_{i,1}^\mu \Delta \mu_i g_{ij} \omega_j^0 + x_{i,1}^\mu \Delta \mu_i g_{ij} x_{j,0}^\omega \Delta \omega_j - x_{i,1}^\mu \Delta \mu_i g_{ij} x_{j,1}^\omega \Delta \omega_j \\
& \quad - \mu_i^0 b_{ij} \mu_j^0 - \mu_i^0 b_{ij} x_{j,0}^\mu \Delta \mu_j + \mu_i^0 b_{ij} x_{j,1}^\mu \Delta \mu_j \\
& - x_{i,0}^\mu \Delta \mu_i b_{ij} \mu_j^0 - x_{i,0}^\mu \Delta \mu_i b_{ij} x_{j,0}^\mu \Delta \mu_j + x_{i,0}^\mu \Delta \mu_i b_{ij} x_{j,1}^\mu \Delta \mu_j \\
& + x_{i,1}^\mu \Delta \mu_i b_{ij} \mu_j^0 + x_{i,1}^\mu \Delta \mu_i b_{ij} x_{j,0}^\mu \Delta \mu_j - x_{i,1}^\mu \Delta \mu_i b_{ij} x_{j,1}^\mu \Delta \mu_j \\
& \quad - \omega_i^0 b_{ij} \omega_j^0 - \omega_i^0 b_{ij} x_{j,0}^\omega \Delta \omega_j + \omega_i^0 b_{ij} x_{j,1}^\omega \Delta \omega_j \\
& - x_{i,0}^\omega \Delta \omega_i b_{ij} \omega_j^0 - x_{i,0}^\omega \Delta \omega_i b_{ij} x_{j,0}^\omega \Delta \omega_j + x_{i,0}^\omega \Delta \omega_i b_{ij} x_{j,1}^\omega \Delta \omega_j \\
& + x_{i,1}^\omega \Delta \omega_i b_{ij} \omega_j^0 + x_{i,1}^\omega \Delta \omega_i b_{ij} x_{j,0}^\omega \Delta \omega_j - x_{i,1}^\omega \Delta \omega_i b_{ij} x_{j,1}^\omega \Delta \omega_j.
\end{aligned} \tag{2}$$

Supplementary equations (1)–(2) are extended forms of equations (9)–(10) presented in the paper, respectively.

In equation (9), the constant clause is

$$\sum_{j=0}^n \mu_i^0 g_{ij} \mu_j^0 + \omega_i^0 g_{ij} \omega_j^0 + \omega_i^0 b_{ij} \mu_j^0 - \mu_i^0 b_{ij} \omega_j^0, \tag{3}$$

the linear clause is

$$\begin{aligned}
& \sum_{j=0}^n \sum_{k=0}^1 (-1)^k \mu_i^0 g_{ij} x_{j,k}^\mu \Delta \mu_j + (-1)^k x_{i,k}^\mu \Delta \mu_i g_{ij} \mu_j^0 \\
& \quad + (-1)^k \omega_i^0 g_{ij} x_{j,k}^\omega \Delta \omega_j + (-1)^k x_{i,k}^\omega \Delta \omega_i g_{ij} \omega_j^0 \\
& \quad + (-1)^k \omega_i^0 b_{ij} x_{j,k}^\mu \Delta \mu_j + (-1)^k x_{i,k}^\omega \Delta \omega_i b_{ij} \mu_j^0 \\
& \quad - (-1)^k \mu_i^0 b_{ij} x_{j,k}^\omega \Delta \omega_j - (-1)^k x_{i,k}^\mu \Delta \mu_i b_{ij} \omega_j^0,
\end{aligned} \tag{4}$$

and the quadratic clause is

$$\begin{aligned}
& \sum_{j=0}^n \sum_{k=0}^1 \sum_{l=0}^1 (-1)^{k+l} x_{i,k}^\mu \Delta \mu_i g_{ij} x_{j,l}^\mu \Delta \mu_j \\
& + (-1)^{k+l} x_{i,k}^\omega \Delta \omega_i g_{ij} x_{j,l}^\omega \Delta \omega_j \\
& + (-1)^{k+l} x_{i,k}^\omega \Delta \omega_i b_{ij} x_{j,l}^\mu \Delta \mu_j \\
& - (-1)^{k+l} x_{i,k}^\mu \Delta \mu_i b_{ij} x_{j,l}^\omega \Delta \omega_j,
\end{aligned} \tag{5}$$

Similarly, in equation (10), the constant clause is

$$\sum_{j=0}^n \omega_i^0 g_{ij} \mu_j^0 - \mu_i^0 g_{ij} \omega_j^0 - \mu_i^0 b_{ij} \mu_j^0 - \omega_i^0 b_{ij} \omega_j^0, \tag{6}$$

the linear clause is

$$\begin{aligned}
& \sum_{j=0}^n \sum_{k=0}^1 (-1)^k \omega_i^0 g_{ij} x_{j,k}^\mu \Delta \mu_j + (-1)^k x_{i,k}^\omega \Delta \omega_i g_{ij} \mu_j^0 \\
& - (-1)^k \mu_i^0 g_{ij} x_{j,k}^\omega \Delta \omega_j - (-1)^k x_{i,k}^\mu \Delta \mu_i g_{ij} \omega_j^0 \\
& - (-1)^k \mu_i^0 b_{ij} x_{j,k}^\mu \Delta \mu_j - (-1)^k x_{i,k}^\mu \Delta \mu_i b_{ij} \mu_j^0 \\
& - (-1)^k \omega_i^0 b_{ij} x_{j,k}^\omega \Delta \omega_j - (-1)^k x_{i,k}^\omega \Delta \omega_i b_{ij} \omega_j^0,
\end{aligned} \tag{7}$$

and the quadratic clause is

$$\begin{aligned}
& \sum_{j=0}^n \sum_{k=0}^1 \sum_{l=0}^1 (-1)^{k+l} x_{i,k}^\omega \Delta \omega_i g_{ij} x_{j,l}^\mu \Delta \mu_j \\
& - (-1)^{k+l} x_{i,k}^\mu \Delta \mu_i g_{ij} x_{j,l}^\omega \Delta \omega_j \\
& - (-1)^{k+l} x_{i,k}^\mu \Delta \mu_i b_{ij} x_{j,l}^\mu \Delta \mu_j \\
& - (-1)^{k+l} x_{i,k}^\omega \Delta \omega_i b_{ij} x_{j,l}^\omega \Delta \omega_j,
\end{aligned} \tag{8}$$

For the Ising model formulation of the net active power, the substitution of

equations (11)–(12) into equation (5) yields

$$\begin{aligned}
p_i = & \sum_{j=0}^n \mu_i^0 g_{ij} \mu_j^0 + \mu_i^0 g_{ij} s_{j,0}^\mu \Delta\mu_j + \mu_i^0 g_{ij} s_{j,1}^\mu \Delta\mu_j + \mu_i^0 g_{ij} s_{j,2}^\mu \Delta\mu_j \\
& + s_{i,0}^\mu \Delta\mu_i g_{ij} \mu_j^0 + s_{i,0}^\mu \Delta\mu_i g_{ij} s_{j,0}^\mu \Delta\mu_j + s_{i,0}^\mu \Delta\mu_i g_{ij} s_{j,1}^\mu \Delta\mu_j + s_{i,0}^\mu \Delta\mu_i g_{ij} s_{j,2}^\mu \Delta\mu_j \\
& + s_{i,1}^\mu \Delta\mu_i g_{ij} \mu_j^0 + s_{i,1}^\mu \Delta\mu_i g_{ij} s_{j,0}^\mu \Delta\mu_j + s_{i,1}^\mu \Delta\mu_i g_{ij} s_{j,1}^\mu \Delta\mu_j + s_{i,1}^\mu \Delta\mu_i g_{ij} s_{j,2}^\mu \Delta\mu_j \\
& + s_{i,2}^\mu \Delta\mu_i g_{ij} \mu_j^0 + s_{i,2}^\mu \Delta\mu_i g_{ij} s_{j,0}^\mu \Delta\mu_j + s_{i,2}^\mu \Delta\mu_i g_{ij} s_{j,1}^\mu \Delta\mu_j + s_{i,2}^\mu \Delta\mu_i g_{ij} s_{j,2}^\mu \Delta\mu_j \\
& + \omega_i^0 g_{ij} \omega_j^0 + \omega_i^0 g_{ij} s_{j,0}^\omega \Delta\omega_j + \omega_i^0 g_{ij} s_{j,1}^\omega \Delta\omega_j + \omega_i^0 g_{ij} s_{j,2}^\omega \Delta\omega_j \\
& + s_{i,0}^\omega \Delta\omega_i g_{ij} \omega_j^0 + s_{i,0}^\omega \Delta\omega_i g_{ij} s_{j,0}^\omega \Delta\omega_j + s_{i,0}^\omega \Delta\omega_i g_{ij} s_{j,1}^\omega \Delta\omega_j + s_{i,0}^\omega \Delta\omega_i g_{ij} s_{j,2}^\omega \Delta\omega_j \\
& + s_{i,1}^\omega \Delta\omega_i g_{ij} \omega_j^0 + s_{i,1}^\omega \Delta\omega_i g_{ij} s_{j,0}^\omega \Delta\omega_j + s_{i,1}^\omega \Delta\omega_i g_{ij} s_{j,1}^\omega \Delta\omega_j + s_{i,1}^\omega \Delta\omega_i g_{ij} s_{j,2}^\omega \Delta\omega_j \\
& + s_{i,2}^\omega \Delta\omega_i g_{ij} \omega_j^0 + s_{i,2}^\omega \Delta\omega_i g_{ij} s_{j,0}^\omega \Delta\omega_j + s_{i,2}^\omega \Delta\omega_i g_{ij} s_{j,1}^\omega \Delta\omega_j + s_{i,2}^\omega \Delta\omega_i g_{ij} s_{j,2}^\omega \Delta\omega_j \\
& + \omega_i^0 b_{ij} \mu_j^0 + \omega_i^0 b_{ij} s_{j,0}^\mu \Delta\mu_j + \omega_i^0 b_{ij} s_{j,1}^\mu \Delta\mu_j + \omega_i^0 b_{ij} s_{j,2}^\mu \Delta\mu_j \\
& + s_{i,0}^\omega \Delta\omega_i b_{ij} \mu_j^0 + s_{i,0}^\omega \Delta\omega_i b_{ij} s_{j,0}^\mu \Delta\mu_j + s_{i,0}^\omega \Delta\omega_i b_{ij} s_{j,1}^\mu \Delta\mu_j + s_{i,0}^\omega \Delta\omega_i b_{ij} s_{j,2}^\mu \Delta\mu_j \\
& + s_{i,1}^\omega \Delta\omega_i b_{ij} \mu_j^0 + s_{i,1}^\omega \Delta\omega_i b_{ij} s_{j,0}^\mu \Delta\mu_j + s_{i,1}^\omega \Delta\omega_i b_{ij} s_{j,1}^\mu \Delta\mu_j + s_{i,1}^\omega \Delta\omega_i b_{ij} s_{j,2}^\mu \Delta\mu_j \\
& + s_{i,2}^\omega \Delta\omega_i b_{ij} \mu_j^0 + s_{i,2}^\omega \Delta\omega_i b_{ij} s_{j,0}^\mu \Delta\mu_j + s_{i,2}^\omega \Delta\omega_i b_{ij} s_{j,1}^\mu \Delta\mu_j + s_{i,2}^\omega \Delta\omega_i b_{ij} s_{j,2}^\mu \Delta\mu_j \\
& - \mu_i^0 b_{ij} \omega_j^0 - \mu_i^0 b_{ij} s_{j,0}^\omega \Delta\omega_j - \mu_i^0 b_{ij} s_{j,1}^\omega \Delta\omega_j - \mu_i^0 b_{ij} s_{j,2}^\omega \Delta\omega_j \\
& - s_{i,0}^\mu \Delta\mu_i b_{ij} \omega_j^0 - s_{i,0}^\mu \Delta\mu_i b_{ij} s_{j,0}^\omega \Delta\omega_j - s_{i,0}^\mu \Delta\mu_i b_{ij} s_{j,1}^\omega \Delta\omega_j - s_{i,0}^\mu \Delta\mu_i b_{ij} s_{j,2}^\omega \Delta\omega_j \\
& - s_{i,1}^\mu \Delta\mu_i b_{ij} \omega_j^0 - s_{i,1}^\mu \Delta\mu_i b_{ij} s_{j,0}^\omega \Delta\omega_j - s_{i,1}^\mu \Delta\mu_i b_{ij} s_{j,1}^\omega \Delta\omega_j - s_{i,1}^\mu \Delta\mu_i b_{ij} s_{j,2}^\omega \Delta\omega_j \\
& - s_{i,2}^\mu \Delta\mu_i b_{ij} \omega_j^0 - s_{i,2}^\mu \Delta\mu_i b_{ij} s_{j,0}^\omega \Delta\omega_j - s_{i,2}^\mu \Delta\mu_i b_{ij} s_{j,1}^\omega \Delta\omega_j - s_{i,2}^\mu \Delta\mu_i b_{ij} s_{j,2}^\omega \Delta\omega_j.
\end{aligned} \tag{9}$$

A similar expression can also be derived for the Ising model formulation of the

net reactive power injection by substituting (11)–(12) into equation (6).

$$\begin{aligned}
q_i = & \sum_{j=0}^n \omega_i^0 g_{ij} \mu_j^0 + \omega_i^0 g_{ij} s_{j,0}^\mu \Delta \mu_j + \omega_i^0 g_{ij} s_{j,1}^\mu \Delta \mu_j + \omega_i^0 g_{ij} s_{j,2}^\mu \Delta \mu_j \\
& + s_{i,0}^\omega \Delta \omega_i g_{ij} \mu_j^0 + s_{i,0}^\omega \Delta \omega_i g_{ij} s_{j,0}^\mu \Delta \mu_j + s_{i,0}^\omega \Delta \omega_i g_{ij} s_{j,1}^\mu \Delta \mu_j + s_{i,0}^\omega \Delta \omega_i g_{ij} s_{j,2}^\mu \Delta \mu_j \\
& + s_{i,1}^\omega \Delta \omega_i g_{ij} \mu_j^0 + s_{i,1}^\omega \Delta \omega_i g_{ij} s_{j,0}^\mu \Delta \mu_j + s_{i,1}^\omega \Delta \omega_i g_{ij} s_{j,1}^\mu \Delta \mu_j + s_{i,1}^\omega \Delta \omega_i g_{ij} s_{j,2}^\mu \Delta \mu_j \\
& + s_{i,2}^\omega \Delta \omega_i g_{ij} \mu_j^0 + s_{i,2}^\omega \Delta \omega_i g_{ij} s_{j,0}^\mu \Delta \mu_j + s_{i,2}^\omega \Delta \omega_i g_{ij} s_{j,1}^\mu \Delta \mu_j + s_{i,2}^\omega \Delta \omega_i g_{ij} s_{j,2}^\mu \Delta \mu_j \\
& - \mu_i^0 g_{ij} \omega_j^0 - \mu_i^0 g_{ij} s_{j,0}^\omega \Delta \omega_j - \mu_i^0 g_{ij} s_{j,1}^\omega \Delta \omega_j - \mu_i^0 g_{ij} s_{j,2}^\omega \Delta \omega_j \\
& - s_{i,0}^\mu \Delta \mu_i g_{ij} \omega_j^0 - s_{i,0}^\mu \Delta \mu_i g_{ij} s_{j,0}^\omega \Delta \omega_j - s_{i,0}^\mu \Delta \mu_i g_{ij} s_{j,1}^\omega \Delta \omega_j - s_{i,0}^\mu \Delta \mu_i g_{ij} s_{j,2}^\omega \Delta \omega_j \\
& - s_{i,1}^\mu \Delta \mu_i g_{ij} \omega_j^0 - s_{i,1}^\mu \Delta \mu_i g_{ij} s_{j,0}^\omega \Delta \omega_j - s_{i,1}^\mu \Delta \mu_i g_{ij} s_{j,1}^\omega \Delta \omega_j - s_{i,1}^\mu \Delta \mu_i g_{ij} s_{j,2}^\omega \Delta \omega_j \\
& - s_{i,2}^\mu \Delta \mu_i g_{ij} \omega_j^0 - s_{i,2}^\mu \Delta \mu_i g_{ij} s_{j,0}^\omega \Delta \omega_j - s_{i,2}^\mu \Delta \mu_i g_{ij} s_{j,1}^\omega \Delta \omega_j - s_{i,2}^\mu \Delta \mu_i g_{ij} s_{j,2}^\omega \Delta \omega_j \\
& - \mu_i^0 b_{ij} \mu_j^0 - \mu_i^0 b_{ij} s_{j,0}^\mu \Delta \mu_j - \mu_i^0 b_{ij} s_{j,1}^\mu \Delta \mu_j - \mu_i^0 b_{ij} s_{j,2}^\mu \Delta \mu_j \\
& - s_{i,0}^\mu \Delta \mu_i b_{ij} \mu_j^0 - s_{i,0}^\mu \Delta \mu_i b_{ij} s_{j,0}^\mu \Delta \mu_j - s_{i,0}^\mu \Delta \mu_i b_{ij} s_{j,1}^\mu \Delta \mu_j - s_{i,0}^\mu \Delta \mu_i b_{ij} s_{j,2}^\mu \Delta \mu_j \\
& - s_{i,1}^\mu \Delta \mu_i b_{ij} \mu_j^0 - s_{i,1}^\mu \Delta \mu_i b_{ij} s_{j,0}^\mu \Delta \mu_j - s_{i,1}^\mu \Delta \mu_i b_{ij} s_{j,1}^\mu \Delta \mu_j - s_{i,1}^\mu \Delta \mu_i b_{ij} s_{j,2}^\mu \Delta \mu_j \\
& - s_{i,2}^\mu \Delta \mu_i b_{ij} \mu_j^0 - s_{i,2}^\mu \Delta \mu_i b_{ij} s_{j,0}^\mu \Delta \mu_j - s_{i,2}^\mu \Delta \mu_i b_{ij} s_{j,1}^\mu \Delta \mu_j - s_{i,2}^\mu \Delta \mu_i b_{ij} s_{j,2}^\mu \Delta \mu_j \\
& - \omega_i^0 b_{ij} \omega_j^0 - \omega_i^0 b_{ij} s_{j,0}^\omega \Delta \omega_j - \omega_i^0 b_{ij} s_{j,1}^\omega \Delta \omega_j - \omega_i^0 b_{ij} s_{j,2}^\omega \Delta \omega_j \\
& - s_{i,0}^\omega \Delta \omega_i b_{ij} \omega_j^0 - s_{i,0}^\omega \Delta \omega_i b_{ij} s_{j,0}^\omega \Delta \omega_j - s_{i,0}^\omega \Delta \omega_i b_{ij} s_{j,1}^\omega \Delta \omega_j - s_{i,0}^\omega \Delta \omega_i b_{ij} s_{j,2}^\omega \Delta \omega_j \\
& - s_{i,1}^\omega \Delta \omega_i b_{ij} \omega_j^0 - s_{i,1}^\omega \Delta \omega_i b_{ij} s_{j,0}^\omega \Delta \omega_j - s_{i,1}^\omega \Delta \omega_i b_{ij} s_{j,1}^\omega \Delta \omega_j - s_{i,1}^\omega \Delta \omega_i b_{ij} s_{j,2}^\omega \Delta \omega_j \\
& - s_{i,2}^\omega \Delta \omega_i b_{ij} \omega_j^0 - s_{i,2}^\omega \Delta \omega_i b_{ij} s_{j,0}^\omega \Delta \omega_j - s_{i,2}^\omega \Delta \omega_i b_{ij} s_{j,1}^\omega \Delta \omega_j - s_{i,2}^\omega \Delta \omega_i b_{ij} s_{j,2}^\omega \Delta \omega_j.
\end{aligned} \tag{10}$$

Supplementary equations (9)–(10) are extended forms of equations (13)–(14) presented in the paper, respectively.

In equation (13), the constant clause is

$$\sum_{j=0}^n \mu_i^0 g_{ij} \mu_j^0 + \omega_i^0 g_{ij} \omega_j^0 + \omega_i^0 b_{ij} \mu_j^0 - \mu_i^0 b_{ij} \omega_j^0, \tag{11}$$



the linear clause is

$$\begin{aligned}
& \sum_{j=0}^n \sum_{k=0}^2 (k+1) \mu_i^0 g_{ij} s_{j,k}^\mu \Delta \mu_j + (k+1) s_{i,k}^\mu \Delta \mu_i g_{ij} \mu_j^0 \\
& + (k+1) \omega_i^0 g_{ij} s_{j,k}^\omega \Delta \omega_j + (k+1) s_{i,k}^\omega \Delta \omega_i g_{ij} \omega_j^0 \\
& + (k+1) \omega_i^0 b_{ij} s_{j,k}^\mu \Delta \mu_j + (k+1) s_{i,k}^\omega \Delta \omega_i b_{ij} \mu_j^0 \\
& - (k+1) \mu_i^0 b_{ij} s_{j,k}^\omega \Delta \omega_j - (k+1) s_{i,k}^\mu \Delta \mu_i b_{ij} \omega_j^0,
\end{aligned} \tag{12}$$

and the quadratic clause is

$$\begin{aligned}
& \sum_{j=0}^n \sum_{k=0}^2 \sum_{l=0}^2 (k+1)(l+1) s_{i,k}^\mu \Delta \mu_i g_{ij} s_{j,l}^\mu \Delta \mu_j \\
& + (k+1)(l+1) s_{i,k}^\omega \Delta \omega_i g_{ij} s_{j,l}^\omega \Delta \omega_j \\
& + (k+1)(l+1) s_{i,k}^\omega \Delta \omega_i b_{ij} s_{j,l}^\mu \Delta \mu_j \\
& - (k+1)(l+1) s_{i,k}^\mu \Delta \mu_i b_{ij} s_{j,l}^\omega \Delta \omega_j.
\end{aligned} \tag{13}$$

Similarly, in equation (14), the constant clause is

$$\sum_{j=0}^n \omega_i^0 g_{ij} \mu_j^0 - \mu_i^0 g_{ij} \omega_j^0 - \mu_i^0 b_{ij} \mu_j^0 - \omega_i^0 b_{ij} \omega_j^0, \tag{14}$$

the linear clause is

$$\begin{aligned}
& \sum_{j=0}^n \sum_{k=0}^2 (k+1) \omega_i^0 g_{ij} s_{j,k}^\mu \Delta \mu_j + (k+1) s_{i,k}^\omega \Delta \omega_i g_{ij} \mu_j^0 \\
& - (k+1) \mu_i^0 g_{ij} s_{j,k}^\omega \Delta \omega_j - (k+1) s_{i,k}^\mu \Delta \mu_i g_{ij} \omega_j^0 \\
& - (k+1) \mu_i^0 b_{ij} s_{j,k}^\mu \Delta \mu_j - (k+1) s_{i,k}^\mu \Delta \mu_i b_{ij} \mu_j^0 \\
& - (k+1) \omega_i^0 b_{ij} s_{j,k}^\omega \Delta \omega_j - (k+1) s_{i,k}^\omega \Delta \omega_i b_{ij} \omega_j^0,
\end{aligned} \tag{15}$$

and the quadratic clause is

$$\begin{aligned}
& \sum_{j=0}^n \sum_{k=0}^2 \sum_{l=0}^2 (k+1)(l+1) s_{i,k}^\omega \Delta \omega_i g_{ij} s_{j,l}^\mu \Delta \mu_j \\
& - (k+1)(l+1) s_{i,k}^\mu \Delta \mu_i g_{ij} s_{j,l}^\omega \Delta \omega_j \\
& - (k+1)(l+1) s_{i,k}^\mu \Delta \mu_i b_{ij} s_{j,l}^\mu \Delta \mu_j \\
& - (k+1)(l+1) s_{i,k}^\omega \Delta \omega_i b_{ij} s_{j,l}^\omega \Delta \omega_j.
\end{aligned} \tag{16}$$

## Supplementary figures

To further clarify the performance of different solvers using the QUBO and Ising model formulations, we present Figure 1 from the main manuscript with a logarithmic scale on the x-axis. This adjustment emphasizes the solver's behavior and progress during the initial iterations.

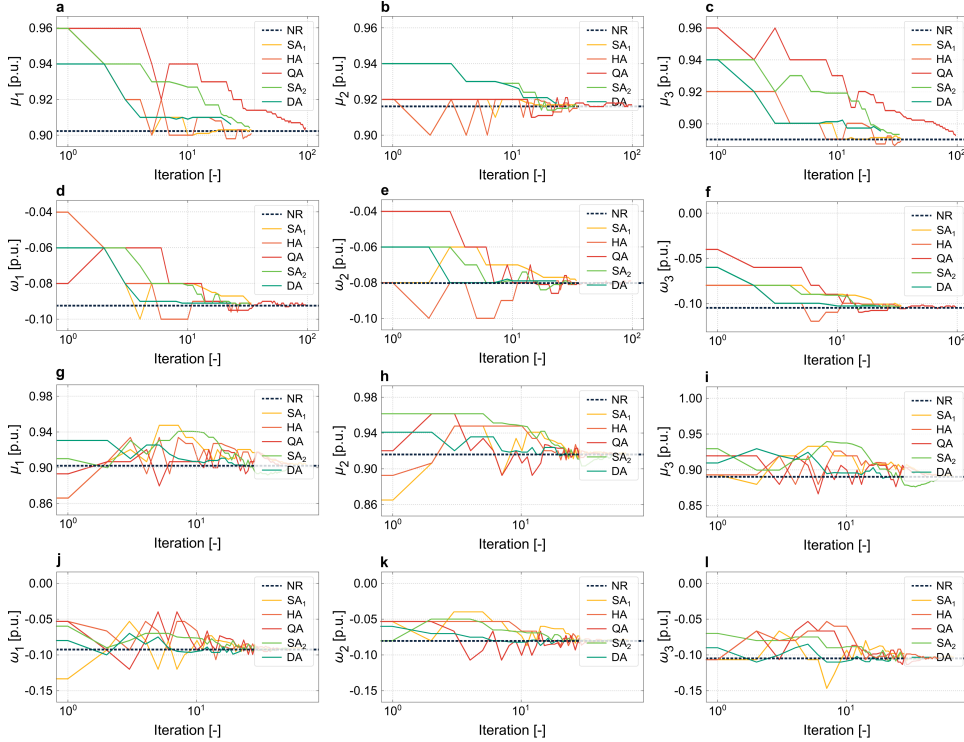

Figure 1: Logarithmic representation of  $\vec{\mu} = [\mu_1, \mu_2, \mu_3]$  and  $\vec{\omega} = [\omega_1, \omega_2, \omega_3]$  obtained by the combinatorial power flow algorithm. Experiments are performed using D-Wave's classical simulated annealer Neal (SA<sub>1</sub>), D-Wave's quantum-classical hybrid annealer (HA), D-Wave's Advantage™ system (QA), Fujitsu's classical simulated annealer (SA<sub>2</sub>), and Fujitsu's digital annealer V3 (DA) using both (a-f) QUBO and (g-l) Ising model formulations for the 4-bus test system. The reference bus  $i = 0$  is not shown. The graphs include  $\mu_i$  and  $\omega_i$  obtained from the Newton-Raphson classical solver (NR).
